# Supplementary material
Source: ML conference proceedings conference paper supplement (https://aclanthology.org/D19-1573)
Supplement: Attachment [file D19-1573.Attachment.zip]

Archive with 3 entries (2 files):
- 1064_OptionalSupplementaryMaterial (1).pdf
- __MACOSX/
- __MACOSX/._1064_OptionalSupplementaryMaterial (1).pdf
